# **Sex differences in fear regulation and reward seeking behaviors in a fear-safety-reward discrimination task**

Abbreviated title: Sex differences in conditioned safety

Eliza M. Greiner<sup>1</sup>, Makenzie R. Norris<sup>1</sup>, Iris Müller<sup>1,2</sup>, Ka H. Ng<sup>1,2</sup>, Susan Sangha<sup>1,2\*</sup>

1. Department of Psychological Sciences

2. Purdue Institute for Integrative Neuroscience

Purdue University, West Lafayette, IN, USA 47907

\*Correspondence to:

Susan Sangha

Department of Psychological Sciences

Purdue University

703 Third St., West Lafayette, IN 47907

(t) 765.494.0648

(e) [sangha@purdue.edu](mailto:sangha@purdue.edu)

Number of figures: 5

Number of tables: 1

## **Abstract**

Reward availability and the potential for danger or safety potently regulates emotion. Despite women being more likely than men to develop emotion dysregulation disorders, there are few studies investigating fear, safety and reward regulation in females. Here, we show that female Long Evans rats do not suppress conditioned freezing in the presence of a safety cue, nor do they extinguish their freezing response, whereas males do both. Females did show evidence of conditioned inhibition of darting, however. Females were also more reward responsive during the reward cue until the first footshock exposure, at which point there were no sex differences in reward seeking to the reward cue. In summary, females showed a significantly different behavioral profile than males in a task that tests the ability to discriminate among fear, safety and reward cues. This paradigm offers a great opportunity to test for mechanisms that are generating these behavioral sex differences.

# **Introduction**

Clinical disorders arising from maladaptive emotion regulation present a large burden on society worldwide. Many of these disorders show comorbidity, for example, addiction with anxiety disorders (Grant et al. 2016). Cues predicting something aversive elicit avoidance and fear behaviors whereas cues predicting reward elicit approach and reward-seeking behaviors. Cues signifying safety have the power to modulate fear and reward-seeking behaviors by informing the organism whether or not the environment is safe (Walasek et al. 1995). Thus, safety, fear and reward behaviors, and the circuitries governing these behaviors, are intertwined. The majority of studies on reward and fear processing have been conducted in parallel, investigating the circuitries separately in primarily male subjects. If we hope to understand and treat comorbid disorders resulting from maladaptive emotion regulation, increased efforts in investigating how these circuitries integrate their functions to influence behavior is needed in both male and female subjects.

Our laboratory has designed and validated a behavioral task in which fear, safety and reward cues are learned within the same session allowing us to assess the animal's ability to discriminate among these cues (Sangha et al. 2013; Sangha, Robinson, et al. 2014; Sangha, Greba, et al. 2014; Ng et al. 2018). Rats are exposed to cues associated with safety, fear (fear cue paired with footshock), and reward (reward cue paired with sucrose). Male rats consistently learn to discriminate among safety, fear and reward cues to 1) suppress conditioned freezing in the presence of a safety cue (fear+safety cue), and 2) increase reward seeking when reward is available (reward cue) (Sangha et al. 2013; Sangha, Robinson, et al. 2014; Sangha, Greba, et al. 2014; Ng et al. 2018). This paradigm also allows us to investigate how safety cues can regulate both fear and reward behaviors. Evidence suggests that reward learning mechanisms overlap with safety learning (Sangha et al. 2013; Rescorla 1969; Walasek et al. 1995; Rogan et al. 2005; Pollak et al. 2008; Tanimoto et al. 2004; Leknes et al. 2011). For example, learned safety can act as a behavioral antidepressant in mice (Pollak et al. 2008), and animals will perform certain behaviors in order to turn on a safety signal (Rescorla 1969; Rogan et al. 2005). Within the amygdala we have shown a subpopulation of neurons responding with the same level of excitation or inhibition during both the reward and safety cues (Sangha et al. 2013). Additionally, we have shown inactivation of the prelimbic or infralimbic cortices of the ventromedial prefrontal cortex have differential effects on reward and safety discrimination, respectively (Sangha, Robinson, et al. 2014). Thus, in male rats, our lab has already shown a

critical involvement of the corticoamygdalar circuit in learning this fear-safety-reward cue discrimination.

Much of the research investigating fear regulation mechanisms have exclusively used male subjects. But, women are more than twice as likely to develop Post-Traumatic Stress Disorder (PTSD) than men, with females having a lifetime prevalence of 8.5% in contrast to 3.4% in males (McLean et al. 2011). In a study using male Vietnam veterans, PTSD patients show impairments in suppressing their fear response in the presence of a safety cue (Jovanovic et al. 2009). In fear studies that have included female rats, it has been shown that females exhibit lower levels of freezing behavior than male rats after repeated fear cue presentations (Daviu et al. 2014). These findings have been thought to indicate a difficulty in fear conditioning learning in female rats. A more recent experiment has identified that approximately 40% of female rats tested exhibit an alternate fear behavior in the form of fast paced movements called 'darting'; this was only seen in approximately 10% of male rats tested (Gruene et al. 2015). In reward studies that have included female rats, significant sex differences in response to drugs of abuse have been seen, with female rats consistently self-administering drugs more rapidly than males (Becker & Koob 2016). This seems at odds with the clinical evidence showing men typically consume more drugs, such as alcohol, than women. However, data also indicate that alcohol consumption for men and women are becoming increasingly similar (Keyes et al. 2008). And, women who become dependent on opioid, cannabis or alcohol progress faster than men through the stages of initial use to dependence (Hernandez-Avila et al. 2004), mimicking the data reporting faster escalation of drug self-administration in female rats.

Taken together, we hypothesized there would be sex differences in the ability to express clear discrimination among fear, safety and reward cues. The inability of male PTSD patients to learn safety signaling has been labeled a biomarker of the disorder (Jovanovic et al. 2012). Due to sex-related differences in human diagnosis of PTSD, with women diagnosed at rates twice that of men (Glover et al. 2015), any differences female rats have in the learning or retention of safety signals could steer towards further research on the neurological processes underlying these variations.

# Results

## *Female rats spend more time reward seeking during reward pre-training*

All rats first underwent 5 reward pre-training sessions in which the reward cue was paired with sucrose delivery. The percent time spent at or in the reward port during each reward cue across each reward session was quantified (Figure 1b). Two-way repeated-measures ANOVAs showed main effects of session ( $F(4,136)=5.395$ ,  $p=0.0005$ ) and sex ( $F(1,34)=10.83$ ,  $p=.0023$ ), but no significant interaction ( $F(4,136)=0.9031$ ,  $p=0.4641$ ). *Post hoc* Sidak's multiple comparisons test showed females spent significantly more time reward seeking during the reward cue than males for sessions R2 ( $p=0.0274$ ), R3 ( $p=0.0151$ ) and R5 ( $p=0.0041$ ). The latency, in seconds, to enter the port post-cue onset was calculated for each reward cue presentation across all sessions (Figure 1c). Two-way repeated-measures ANOVAs showed a main effect of sex ( $F(1,34)=20.37$ ,  $p<.0001$ ), but no significant interaction ( $F(4,136)=1.684$ ,  $p=0.1571$ ) or main effect of session ( $F(4,136)=0.7755$ ,  $p=0.5429$ ). *Post hoc* Sidak's multiple comparisons test showed females were significantly faster to enter the port than males during the last 3 reward sessions (R3,  $p=0.001$ ; R4,  $p=0.0391$ ; R5,  $p=0.0014$ ). Taken together, female rats consistently spent more time than males in the reward port during the reward cue in reward pre-training sessions.

## *Female rats do not show conditioned inhibition of freezing but instead conditioned inhibition of darting*

After reward pre-training, rats were then exposed to sessions consisting of reward, fear and safety cues. The reward cue and sucrose reward were the same as the reward pre-training sessions. The fear cue was paired with a 0.5mA footshock, and both the safety cue and fear+safety cue did not result in footshock or sucrose.

The percent time spent at or in the reward port during each cue across session was quantified for each DC session (Figure 2b). Two-way repeated-measures ANOVAs showed a significant cue by sex effect, as well as main effects of cue and sex for DC1 (Table 1). *Post hoc* Sidak's multiple comparisons test showed that, during DC1, females spent significantly more time reward seeking during the reward cue compared to males ( $p<0.001$ ), consistent to what was seen in reward pre-training. For the remaining DC2-4 sessions, a main effect of cue was observed (Table 1) and *post hoc* Sidak's multiple comparisons test showed that both male and female rats spent significantly more time reward seeking during the reward cue compared to all

other cues ( $p < 0.0001$ ), with no significant differences between the males and females. Thus, the noticeable increase in reward seeking in the females, that was seen during reward pre-training, dissipated by the 2<sup>nd</sup> DC session.

The percent time freezing during each cue across session was quantified for each DC session (Figure 2c). Two-way repeated-measures ANOVAs showed a significant cue by sex effect for sessions DC2-4, as well as main effects of cue and sex for every session (Table 1). *Post hoc* Sidak's multiple comparisons tests showed that, for every session, females displayed significantly more freezing to the fear+safety cue compared to males (DC1,  $p = 0.0313$ ; DC2,  $p = 0.007$ ; DC3,  $p = 0.0007$ ; DC4,  $p < 0.0001$ ). Females also showed significantly higher freezing levels to the fear cue compared to males during DC2 ( $p = 0.0111$ ). Males showed a significant reduction in freezing levels to the fear+safety cue compared to the fear cue during sessions DC3 ( $p = 0.0156$ ) and DC4 ( $p < 0.0001$ ), thus showing significant conditioned inhibition of freezing. Females did not show a significant reduction for any session.

The number of darts during each cue was also quantified for each DC session and expressed as a dart rate (Figure 2d; # darts/20s cue). Darting behavior during cue presentation was largely absent until DC3 and DC4. Two-way repeated-measures ANOVAs showed a significant cue by sex effect for DC4, as well as main effects of cue, for DC2-4, and sex, for DC1 and DC4 (Table 1). *Post hoc* Sidak's multiple comparisons test showed that, during DC4, females expressed more darting behavior compared to males during both the fear cue ( $p < 0.0001$ ) and the fear+safety cue ( $p = 0.0079$ ). The females also showed a significant reduction in darting behavior during the fear+safety cue compared to the fear cue during DC4 ( $p = 0.0166$ ), suggesting some level of conditioned inhibition present in the females, when darting is taken into account.

#### *Female rats do not show extinction of freezing*

The day after the last DC session all rats underwent fear and reward extinction within the same session. That is, both the fear and reward cues were presented within the same training session, without footshocks or sucrose presentations.

For reward extinction training, there was no main effect of reward trial ( $F(19,646) = 1.526$ ,  $p = 0.0704$ ) or sex ( $F(1,34) = 1.31$ ,  $p = 0.2603$ ) and no interaction ( $F(19,646) = 0.8927$ ,  $p = 0.5924$ ); there was also no significant difference between male and female groups for any trial (Figure 3Bi). For the extinction test (Figure 3Bii), there was a main effect of cue (2-way RM ANOVA;

F(3,102)=15.68,  $p<0.0001$ ) and sex ( $F(1,34)=6.156$ ,  $p=0.0182$ ). *Post hoc* Sidak's multiple comparisons test showed females had significantly more port activity than males during the safety cue ( $p=0.0452$ ).

To assess fear extinction the averaged percent time freezing during each trial of fear extinction training was calculated (Figure 3Ci). There was a main effect of fear trial (2-way RM ANOVA;  $F(19, 646)=7.69$ ,  $p<0.0001$ ) and sex (2-way RM ANOVA;  $F(1, 34)=4.607$ ,  $p=0.0391$ ), but no significant interaction ( $F(19, 646)=1.566$ ,  $p=0.059$ ). Compared to trial 1, males showed significantly reduced freezing in extinction trials 8, 9 and 11-20 (*post hoc* Tukey's multiple comparisons test,  $p<0.05$ ), demonstrating good fear extinction. In contrast, females only showed a significant reduction in freezing during trial 19 compared to the first trial (*post hoc* Tukey's multiple comparisons test,  $p=0.0394$ ), demonstrating relatively absent fear extinction. For the extinction test (Figure 3Cii), there was a main effect of cue ( $F(3,102)=134.7$ ,  $p<0.0001$ ) and sex ( $F(1, 34)=6.217$ ,  $p=0.0177$ ), as well as a significant interaction of cue X sex ( $F(3, 102)=3.481$ ,  $p=0.0187$ ). *Post hoc* Sidak's multiple comparisons test showed that females froze significantly more than males to the fear ( $p=0.0146$ ) and fear+safety ( $p=0.0091$ ) cues.

We also assessed darting levels across extinction in response to each fear cue presentation (Figure 3Di). During extinction training, there was a main effect of sex ( $F(1,34)=4.816$ ,  $p=0.0351$ ), but no effect of trial ( $F(19,646)=0.6941$ ,  $p=0.8268$ ) and no significant interaction ( $F(19, 646)=1.083$ ,  $p=0.3640$ ). *Post hoc* Sidak's multiple comparisons test showed no significant differences between males and females for any trial. For the extinction test (Figure 3Dii), there was a significant cue X sex interaction ( $F(3,102)=4.447$ ,  $p=0.0056$ ), as well as a main effect of both cue ( $F(3, 102)=4.248$ ,  $p=0.0072$ ) and sex ( $F(1, 34)=4.834$ ,  $p=0.0348$ ). Females showed a significantly higher dart rate than males during the fear cue (*post hoc* Sidak's multiple comparisons test,  $p=0.0002$ ), which was also significantly higher than the dart rate to all other cues in the females (*post hoc* Sidak's multiple comparisons test,  $p<0.01$ ). To test if darting behavior in females influenced extinction of freezing, females were categorized into 'darters' and 'non-darters' based on their dart rates exhibited during the last DC session, DC4 (Figure 4A). A median split of dart rates during the fear cue in session DC4, created 'darter' ( $n=10$ ) and 'non-darter' ( $n=10$ ) subgroups. Of the 10 females classified as 'darters', 8 of them also exhibited dart rates in the top 50% during the fear+safety cue (Figure 4A, right). When subdivided, 'darters' and 'non-darters' did not show any group differences in extinction of darting (Figure 4B). A two-way repeated measures ANOVA of percent time freezing during each fear cue



presentation (Figure 4Ci) revealed a group X trial interaction ( $F(19,342)=1.871$ ,  $p=0.0154$ ), and main effects of group ( $F(1, 18)=6.931$ ,  $p=0.0169$ ) and trial ( $F(19, 342)=2.621$ ,  $p=0.0003$ ). When subdivided, 'darters' did show a significant reduction in freezing levels to the fear cue across extinction (*post hoc* Tukey's multiple comparisons test, compared to trial 1, trials 6, 8-10, 14, and 17-20 were significant,  $p<0.05$ ), while 'non-darters' persisted in their freezing responses throughout all of extinction training ( $p>0.05$  for each trial compared to trial 1). There were also between group differences across extinction training: during trials 15 and 19, 'darters' were significantly lower than 'non-darters' (*post hoc* Sidak's multiple comparisons test,  $p<0.05$ ). During the extinction test the next day (Figure 4Cii), between group differences were still detected with 'darters' exhibiting less freezing to the fear cue compared to 'non-darters' (2-way RM ANOVA; group X cue interaction  $F(3, 54)=4.416$ ,  $p=0.0075$ ; main effect of cue ( $F(3, 54)=86.36$ ,  $p<0.0001$ ; *post hoc* Sidak's multiple comparisons test,  $p=0.0103$ ).

#### *Shock reactivity in males versus females*

To exclude possible sex differences in pain sensitivity and footshock perception a separate cohort of 8 male and 8 age-matched female rats received 11 unsignaled footshocks of increasing intensities (0.3 mA, 0.35 mA, 0.4 mA, 0.45 mA, 0.5 mA, 0.55 mA, 0.6 mA, 0.7 mA, 0.8 mA, 0.9, 1.0 mA) with an inter-stimulus interval of 2 min. Freezing increased as a function of shock intensities (Figure 5A; 2-way RM ANOVA;  $F(11,121)=25.9$ ,  $p<0.0001$ ). No main effects of sex ( $F(1,121)=0.2871$ ,  $p=0.6027$ ) or sex by shock ( $F(11,121)=1.413$ ,  $p=0.1754$ ) were observed. Our experiments utilized a shock intensity of 0.5mA throughout this study. For this particular intensity, we also noted the number of rats that jumped or darted in response to a 0.5mA shock. No sex differences in the number of rats jumping in response to the 0.5mA footshock were observed ( $\chi^2$ :  $p>0.9$ ). The number of female rats darting after the 0.5mA footshock was higher than males, but not significantly ( $\chi^2$ :  $p=0.0769$ ), with five of the eight female rats tested exhibiting the behavior. A higher number of females darting in response to the footshock in this test would still not explain the lack of conditioned inhibition of freezing in the females, as freezing levels at 0.5mA was slightly lower than the males (Figure 5A). Our results do not definitively show, but do suggest, that females may respond more preferentially to a footshock with a darting response.



## Discussion

In this study, we show females exhibit a significantly different behavioral profile than males in a task that tests for reward, fear and safety cue discrimination, as well as conditioned inhibition and extinction. Female Long Evans rats showed more reward seeking early in training and persistently high freezing levels to the fear cue when in the presence of a safety cue or after fear extinction. When freezing data was re-assessed in the context of darting levels, females categorized as 'darters' did show a significant reduction in freezing levels to the fear cue during extinction, while 'non-darters' did not show any evidence of fear extinction. This data adds to the growing body of evidence of sex differences in fear regulation and highlights the advantages of using more complex learning paradigms with additional behavioral measurements.

Even though studies including female subjects have been proportionally low, several studies have reported clear sex differences in fear regulation. Most of these are consistent with our findings of reduced discrimination between fear and safety signals. For instance, female mice show more generalization of fear to novel and safe contexts compared to males, and with this generalization there is a concurrent increase in basal amygdala activity (Keiser et al. 2017). Male and female rats also respond differently to the controllability of a stressor. Males display reduced fear during escapable stress versus inescapable stress whereas females exhibit no beneficial effects of perceiving a stressor as escapable and controllable (Baratta et al. 2018). The buffering effects seen in these males were linked to prelimbic cortical neurons projecting to the dorsal raphe nucleus, which do not appear to be engaged in females. Females displaying a similar fear response to both inescapable and escapable stress is similar to our findings of females showing equivalent freezing levels to the fear cue in the presence or absence of a safety cue, in that there were no buffering effects seen by the safety cue. It appears that females do not downregulate their fear response in situations cued as safe.

Our data showing an increase in darting behavior in female rats as the number of fear cue-footshock trials increase is consistent with another report using female rats in a fear conditioning and extinction paradigm (Gruene et al. 2015). Like us, Gruene et al (2015) also show darting levels increase as learning about the fear cue advances. Compared to us, Gruene et al (2015) report notably higher darting frequencies, which is most likely due to the differences in shock intensities and number of trials; our study used 4 trials of 0.5mA per day for 4 days compared to their study using 7 trials of 0.7mA on one day. Our study also includes reinforced reward trials within the same sessions as the fear cue-footshock trials, which could alter the contextual

expectations of the training session and reduce darting levels. Like Gruene et al (2015) we similarly categorized our females into ‘darters’ and ‘non-darters’, and both of our studies reveal ‘darters’ exhibiting reduced freezing levels in response to extinction. Interestingly in our study the ‘darters’ did not significantly reduce darting levels during extinction training but instead they reduced their freezing levels. It would be interesting in future studies to identify what leads a female to become a ‘darter’ versus ‘non-darter’. As darting is a more active response compared to freezing, the circuits engaged during potential threats would likely be different in these two populations.

Our findings showing a lack of conditioned inhibition of freezing in females appear to be inconsistent with a recent study demonstrating a lack of sex differences in conditioned inhibition of freezing (Foilb et al. 2018). This is likely due to differences in our respective protocols. First, their footshock intensity was 1.2mA, resulting in freezing levels >90% during the fear cue. As footshock intensity and number of trials are consistently inconsistent across studies, it would be interesting to assess if freezing and darting levels in females follow a linear trend with increasing training intensity, or if there is instead a possibly U-shaped relationship. Foilb et al (2018) also used separate presentations of the fear cue and safety cue throughout training and employed the fear+safety cue summation test during recall, whereas we include fear+safety trials as part of the training. In contrast, another study has shown females discriminate equally to males early in training but then generalize their fear response to the safety cue with continued training (Day et al. 2016). While the females in our study clearly showed equivalent freezing levels to both the fear and fear+safety cues at all time points throughout training, they did not increase their freezing levels to the safety cue when presented alone. And, lastly, our paradigm, unlike others, includes reinforced reward trials during the training of fear and safety cues, which would change the context from a ‘threat-no threat’ situation to a ‘threat-no threat-reward’ situation, inducing approach behaviors on top of defensive behaviors.

Altogether, the data paints a consistent picture of females showing heightened fear responses to cues signaling safety, mimicking the clinical picture in women (Gamwell et al. 2014; Lonsdorf et al. 2015). The presentation of a safety signal not only decreases fear, but also stimulates opposing neuronal activity. Viewing synaptic responses in the striatum during safety signal presentation has shown that brain regions dealing with approach and reward become activated (Rogan et al. 2005). These findings have also been translated to using safety signals to overcome anhedonia in rats (Pollak et al. 2008), showing that safety signals may also be

regulating emotion in addition to conditioned behavior (Foilb & Christianson 2018). In our study, females consistently showed elevated reward seeking behavior during the reward cue compared to males beginning in the second reward pre-training session. This data appears consistent with reward studies showing significant sex differences in response to drugs of abuse, with female rats consistently self-administering drugs more rapidly than males (Becker & Koob 2016). The increased reward seeking in females seen in our study remained until the end of the first DC session at which point they were equivalent to the males. Interestingly, DC1 is the first time the animals are exposed to footshock. Taking into account the lack of conditioned inhibition of freezing in the females, the females may no longer be as motivated to seek rewards in the face of adverse footshocks. This would be consistent with the report that female rats sacrifice their metabolic needs in order to avoid shocks more than males (Pellman et al. 2017).

Numerous sex differences have been reported in the functioning of the stress neuropeptide, corticotropin-releasing factor (CRF), with differences in receptor expression, distribution, trafficking and signaling (reviewed in (Bangasser & Wiersielis 2018)). The majority of these differences lead to enhanced CRF efficacy in females which may lead to heightened sensitivity to stressors in females. Recently, the gene for CRH receptor 1 (*CRHR1*) has been identified as a possible candidate gene for mood and anxiety disorders. Weber et al. (2016) have shown that carrying the *CRHR1* minor rs17689918 allele increases the risk for panic disorders in women. Patients carrying this risk allele also demonstrate more generalization of fear to a safety cue, increased amygdala activation during the safety cue and decreased frontal cortex activation with discriminative fear conditioning. Thus, aberrant CRF signaling can lead to sustained fear under conditions cued as safe and can be manifested by changes in neural activity in the amygdala and frontal cortex.

Neural activity in the amygdala and prefrontal cortex has been shown by our lab to also play a critical role in effective discriminative conditioning in male rats. We have previously identified neurons in the basolateral amygdala (BLA) that discriminate among safety, fear and reward cues in male rats (Sangha et al. 2013); our future experiments will test if females show the same discriminative neurons. Using reversible pharmacological inactivations in male rats, we have also demonstrated that the infralimbic prefrontal cortex (IL) is necessary for suppression of conditioned fear during a safety cue and the prelimbic prefrontal cortex (PL) is necessary for fear expression and discriminatory reward seeking (Sangha, Robinson, et al. 2014). These results indicate that activating the IL in the females may improve conditioned inhibition to the

combined fear and safety cues. Our results with male rats also show that a D1 receptor agonist infused into the BLA disrupts suppression of conditioned fear (Ng et al. 2018), implicating dopaminergic ventral tegmental area (VTA) neurons projecting to the BLA in safety-fear-reward discrimination. The VTA, and another reward-related area the nucleus accumbens, have been shown to have increased activity in female mice that also show enhanced conditioned place preference for cocaine during oestrus compared to females in dioestrus or males (Calipari et al. 2017).

Our findings are consistent with human studies where females show less discrimination between the fear and safety signals than males (Gamwell et al. 2014; Lonsdorf et al. 2015), which may reflect underlying mechanisms of increased prevalence for anxiety and stress-related disorders in women. For example, a deficiency in effective safety signal processing has been linked to Post-traumatic Stress Disorder (Jovanovic et al. 2009; Jovanovic et al. 2010), panic disorder (Gorka et al. 2014), and anxiety (Lissek et al. 2005), all disorders with a higher incidence in women than men (McLean et al. 2011). In our paradigm, females show a significantly different behavioral profile than males that is consistent with the clinical picture, thus making it a great tool to test for the neurobiological mechanisms underlying these sex differences.

# Methods

## Subjects

A total of 24 adult male (215-375g) and 28 adult age-matched female (198-230g) Long Evans rats (Blue Spruce; Envigo, Indianapolis), were single-housed and handled for 1 week prior to testing. All procedures were performed during the light cycle and approved by the Purdue Animal Care and Use Committee. Rats had *ad libitum* access to food and water prior to the start of the experiment. After experiment onset, they were maintained on a food restricted diet (20g per day for males; 16g per day for females) until the last day of the experiment.

## Apparatus

The rats were trained in operant conditioning chambers consisting of Plexiglas boxes (32cm length x 25cm width x 30cm height) encased in sound-attenuating chambers (Med Associates, ST Albans, VT). 10% liquid sucrose was delivered through a recessed port 2cm above the floor in the center of one wall. Two lights (28V, 100mA) were located 10.5cm from floor on either side of the port. A light (28V, 100mA) 27cm above the floor on the wall was on throughout the entire session. Auditory cues were delivered via a speaker (ENV-224BM) located 24cm from the floor on the same wall as the port. Footshocks were delivered through a grid floor via a constant current aversive stimulator (ENV-414S). An overhead video camera and side video camera recorded the sessions for subsequent offline video scoring.

## Behavioral Procedures

Reward pre-training (5 sessions): An auditory cue is paired with 10% sucrose solution delivery (100µl) and serves as the reward cue (25 trials; ITI, 90-130s).  
Habituation (1 session): Rats continue to receive 25 reward cue-sucrose pairings (ITI, 90-130s) in addition to 5 unreinforced presentations ( $\emptyset$ ) each of the future fear and safety cues in order to habituate the rats to their presentation, thereby reducing any baseline freezing to these novel cues.  
Discriminative conditioning (4 sessions): Reward cue-sucrose pairings continue (15 trials). Another auditory cue is paired with a mild 0.5mA, 0.5s footshock and serves as the fear cue (4 trials). In separate trials the 20s fear cue is presented at the same time as a 20s safety light cue resulting in no footshock ('fear+safety', 15 trials). Trials in which the safety cue is presented alone without any footshock are also included to assess whether freezing develops to the safety cue as well as providing the animal with additional trials that contains a safety cue-no shock contingency (10 trials). Trials are presented pseudorandomly (ITI, 100-140 s). Cues were

counterbalanced across subjects with the caveat that the fear+safety compound cue is composed of one auditory cue and one light cue. Eight of the male rats and 12 of the female rats underwent the DC training in which the reward cue was a continuous auditory cue (3 kHz, 20s cue; 70dB), the fear cue a pulsing auditory cue (11 kHz, 20s; 70dB) succeeded by a mild footshock (0.5mA, 0.5s), and the safety cue (a light, 28V, 100mA located on both sides of the port) was followed by the absence of a stimulus. The remaining eight male rats and eight female rats underwent training in which the fear and safety cue stimuli were counterbalanced: the light served as the fear cue and the pulsing auditory cue served as the safety cue.

To exclude possible sex differences in pain sensitivity and foot shock perception a separate batch of male (n=8) and age-matched female (n=8) rats was presented with a series of unsignalled foot shocks of increasing intensities (0.3 mA, 0.35 mA, 0.4 mA, 0.45 mA, 0.5 mA, 0.55 mA, 0.6 mA, 0.7 mA, 0.8 mA, 0.9, 1.0 mA) with an inter-stimulus interval of 2 min. The session was flanked with 5 min intervals in which no stimulus occurred.

#### *Data analyses*

Our experimental groups to directly compare males and females on discrimination behavior consisted of 16-20 rats, which is typical and consistent with our prior published studies using this behavioral task. Cohorts of 4 or 8 female rats were trained alongside cohorts of 4 male rats for a total of 4 replications. Fear behavior was assessed manually offline from videos by measuring freezing, defined as complete immobility with the exception of respiratory movements, which is an innate defensive behavior (Blanchard & Blanchard 1969; Fendt & Fanselow 1999). The total time spent freezing during each 20s cue was quantified and expressed as percentage. Measuring the total time the animal spent inside the reward port and at the entrance of the port with nose positioned at port entrance during each cue assessed reward seeking behavior and was expressed as a percentage. Darting behavior was detected and quantified offline from videos recorded from overhead cameras via a custom MatLab program (Supplementary Files), with movements of a velocity of 23.5cm/s or faster qualifying as a single dart (Gruene et al., 2015); these were also confirmed manually. Darting was expressed as a dart rate, defined as the number of darts per 20s cue. Three individuals performed manual offline behavioral scoring. Pearson's correlations of behavioral values between scorers were greater than  $r = 0.80$ . Behavioral data were analyzed with one-way or two-way repeated measures ANOVAs, with sex as the independent factor and condition as the repeated factor,

followed by *post hoc* Sidak's, Tukey's or Dunnett's multiple comparisons tests with GraphPad Prism 7.

For shock sensitivity testing, freezing duration in the 2-min intervals between shock presentations was scored manually as an indicator of fear, as well as darting and jumping as an immediate shock response. To compare these simpler reactionary behaviors to differing shock intensities, 8 rats per sex was determined to be sufficient based on similar shock behavior studies. For the freezing durations, a two-way repeated measures ANOVA was carried out via GraphPad Prism 7, with sex as the independent factor and shock intensity as the repeated factor. Darting and jumping were assessed as dichotomous variables with darting/no darting and jumping/no jumping, respectively. For both, a Cochran test was performed.

#### **Acknowledgements:**

We thank Yolanda Jonker, Signe Hobbaugh, Jessica Kerns, Emma Speckelson, Emily Willis, and Mackenzie McIntosh for excellent animal care. IM was supported by the Alexander von Humboldt foundation. This work was supported by NIMH R01MH110425 to SS.

#### **Author contribution:**

EMG, MRN, and IM performed experiments, scored behavior and analysed results. KHN created MatLab analysis programs. EMG contributed to writing. SS designed the study, analysed results, and wrote the manuscript.

#### **Competing interests:**

The authors declare no competing interests.



# References

- Bangasser, D.A. & Wiersielis, K.R., 2018. Sex differences in stress responses : a critical role for corticotropin-releasing factor.
- Baratta, M. V et al., 2018. Behavioural and neural sequelae of stressor exposure are not modulated by controllability in females. , 47(July 2017), pp.959–967.
- Becker, J.B. & Koob, G.F., 2016. Sex Differences in Animal Models : Focus on Addiction. , (April), pp.242–263.
- Blanchard, R.J. & Blanchard, D.C., 1969. Crouching as an index of fear. *Journal of comparative and physiological psychology*, 67(3), pp.370–5.
- Calipari, E.S. et al., 2017. Dopaminergic dynamics underlying sex-specific cocaine reward. *Nature Communications*, 8.
- Christianson, J.P. et al., 2012. Inhibition of Fear by Learned Safety Signals: A Mini-Symposium Review. *Journal of Neuroscience*, 32(41), pp.14118–14124.
- Daviu, N. et al., 2014. Sex differences in the behavioural and hypothalamic-pituitary-adrenal response to contextual fear conditioning in rats. *Hormones and Behavior*, 66(5), pp.713–723. Available at: <http://dx.doi.org/10.1016/j.yhbeh.2014.09.015>.
- Day, H.L.L., Reed, M.M. & Stevenson, C.W., 2016. Sex differences in discriminating between cues predicting threat and safety. *Neurobiology of Learning and Memory*, 133, pp.196–203.
- Fendt, M. & Fanselow, M.S., 1999. The neuroanatomical and neurochemical basis of conditioned fear. *Neuroscience & Biobehavioral Reviews*, 23(5), pp.743–760.
- Foilib, A.R. et al., 2018. Sex differences in fear discrimination do not manifest as differences in conditioned inhibition. *Learning and Memory*, 25(1), pp.49–53.
- Foilib, A.R. & Christianson, J.P., 2018. Chapter 11 Brain Mechanisms for Learning and Using Safety Signals. In S. Sangha & D. Foti, eds. *Neurobiology of Abnormal Emotion and Motivated Behaviors: Integrating Animal and Human Research*. Cambridge, Massachusetts: Academic Press, pp. 205–224.
- Gamwell, K. et al., 2014. Fear Conditioned Responses and PTSD Symptoms in Children : Sex Differences in Fear-Related Symptoms.
- Glover, E.M., Jovanovic, T. & Norrholm, S.D., 2015. Estrogen and extinction of fear memories: Implications for posttraumatic stress disorder treatment. *Biological Psychiatry*, 78(3), pp.178–185. Available at: <http://dx.doi.org/10.1016/j.biopsych.2015.02.007>.
- Gorka, S.M. et al., 2014. Aversive responding to safety signals in panic disorder: The moderating role of intolerance of uncertainty. *Journal of Anxiety Disorders*, 28(7), pp.731–736. Available at: <http://dx.doi.org/10.1016/j.janxdis.2014.06.004>.

- Grant, B.F. et al., 2016. Epidemiology of DSM-5 drug use disorder results from the national epidemiologic survey on alcohol and related conditions-III. *JAMA Psychiatry*, 73(1), pp.39–47.
- Gruene, T.M. et al., 2015. Sexually divergent expression of active and passive conditioned fear responses in rats. *eLife*, 4, pp.1–9. Available at: <http://elifesciences.org/lookup/doi/10.7554/eLife.11352>.
- Hernandez-Avila, C.A., Rounsaville, B.J. & Kranzler, H.R., 2004. Opioid-, cannabis- and alcohol-dependent women show more rapid progression to substance abuse treatment. *Drug and Alcohol Dependence*, 74(3), pp.265–272.
- Jovanovic, T. et al., 2010. Impaired fear inhibition is a biomarker of PTSD but not depression. *Depression and anxiety*, 27(3), pp.244–251. Available at: <http://www.pubmedcentral.nih.gov/articlerender.fcgi?artid=2841213&tool=pmcentrez&rendertype=abstract>.
- Jovanovic, T. et al., 2012. Impaired safety signal learning may be a biomarker of PTSD. *Neuropharmacology*, 62(2), pp.695–704. Available at: <http://www.sciencedirect.com/science/article/pii/S0028390811001031>.
- Jovanovic, T. et al., 2009. Posttraumatic stress disorder may be associated with impaired fear inhibition: Relation to symptom severity. *Psychiatry Research*, 167(1–2), pp.151–160. Available at: <http://dx.doi.org/10.1016/j.psychres.2007.12.014>.
- Keiser, A.A. et al., 2017. Sex Differences in Context Fear Generalization and Recruitment of Hippocampus and Amygdala during Retrieval. *Neuropsychopharmacology*, 42(2), pp.397–407. Available at: <http://dx.doi.org/10.1038/npp.2016.174>.
- Keyes, K.M., Grant, B.F. & Hasin, D.S., 2008. Evidence for a closing gender gap in alcohol use, abuse, and dependence in the United States population. *Drug and Alcohol Dependence*, 93(1–2), pp.21–29.
- Leknes, S. et al., 2011. Relief as a reward: Hedonic and neural responses to safety from pain. *PLoS ONE*, 6(4).
- Lissek, S. et al., 2005. Classical fear conditioning in the anxiety disorders: A meta-analysis. *Behaviour Research and Therapy*, 43(11), pp.1391–1424.
- Lonsdorf, T. B. et al., 2015. Sex differences in CS-discrimination during context-dependent fear learning and its retrieval - the role of biological sex, contraceptives and menstrual cycle phases. *in Press*, 40(6), pp.368–375.
- Mclean, C.P. et al., 2011. Gender differences in anxiety disorders: Prevalence, course of illness, comorbidity and burden of illness. *Journal of Psychiatric Research*, 45(8), pp.1027–1035.

- Ng, K.H. et al., 2018. Altering D1 receptor activity in the basolateral amygdala impairs fear suppression during a safety cue. *Neurobiology of Learning and Memory*, 147.
- Pellman, B.A. et al., 2017. Sexually Dimorphic Risk Mitigation Strategies in Rats. *Eneuro*, 4(1), p.ENEURO.0288-16.2017. Available at: <http://eneuro.sfn.org/lookup/doi/10.1523/ENEURO.0288-16.2017>.
- Pollak, D.D. et al., 2008. An Animal Model of a Behavioral Intervention for Depression. *Neuron*, 60(1), pp.149–161.
- Rescorla, R.A., 1969. Conditioned inhibition of fear resulting from negative CS-US contingencies. *Journal of comparative and physiological psychology*, 67(4), pp.504–509.
- Rogan, M.T. et al., 2005. Distinct neural signatures for safety and danger in the amygdala and striatum of the mouse. *Neuron*, 46(2), pp.309–20. Available at: <http://www.ncbi.nlm.nih.gov/pubmed/15848808>.
- Sangha, S., Robinson, P.D., et al., 2014. Alterations in reward, fear and safety cue discrimination after inactivation of the rat prelimbic and infralimbic cortices. *Neuropsychopharmacology : official publication of the American College of Neuropsychopharmacology*, 39(10), pp.2405–13. Available at: <http://www.ncbi.nlm.nih.gov/pubmed/24727732>.
- Sangha, S., Greba, Q., et al., 2014. Heightened fear in response to a safety cue and extinguished fear cue in a rat model of maternal immune activation. *Frontiers in behavioral neuroscience*, 8(May), p.168. Available at: <http://www.pubmedcentral.nih.gov/articlerender.fcgi?artid=4019856&tool=pmcentrez&rendertype=abstract>.
- Sangha, S., Chadick, J.Z. & Janak, P.H., 2013. Safety encoding in the basal amygdala. *The Journal of neuroscience : the official journal of the Society for Neuroscience*, 33(9), pp.3744–51. Available at: <http://www.ncbi.nlm.nih.gov/pubmed/23447586>.
- Tanimoto, H., Heisenberg, M. & B, G., 2004. Event timing turns punishment to reward. *Nature*, 430, p.983. Available at: <http://www.nature.com/doi/10.1038/nature02816>.
- Walasek, G., Wesierska, M. & Zieliński, K., 1995. Conditioning of fear and conditioning of safety in rats. *Acta neurobiologiae experimentalis*, 55(2), pp.121–132.
- Weber, H. et al., 2016. Allelic variation in CRHR1 predisposes to panic disorder: Evidence for biased fear processing. *Molecular Psychiatry*, 21(6), pp.813–822.

| Reward seeking |                                         |                                         |                                     |
|----------------|-----------------------------------------|-----------------------------------------|-------------------------------------|
| <i>Session</i> | <i>Cue x Sex effects</i>                | <i>Main effect of cue</i>               | <i>Main effect of sex</i>           |
| DC1            | F(3,102) = 3.472,<br><b>p=0.0189</b>    | F(3,102) = 95.16,<br><b>p&lt;0.0001</b> | F(1,34) = 9.827,<br><b>p=0.0035</b> |
| DC2            | F(3,102) = 0.7742,<br>p=0.5110          | F(3,102) = 227.9,<br><b>p&lt;0.0001</b> | F(1,34) = 4.69,<br><b>p=0.0374</b>  |
| DC3*           | F(3,90) = 0.6512,<br>p=0.5843           | F(3,90) = 117,<br><b>p&lt;0.0001</b>    | F(1,30)=1.041,<br>p=0.3157          |
| DC4            | F(3,102) = 2.255,<br>p=0.0864           | F(3,102) = 181.2,<br><b>p&lt;0.0001</b> | F(1,34) = 2.453,<br>p=0.1266        |
| Freezing       |                                         |                                         |                                     |
| <i>Session</i> | <i>Cue x Sex effects</i>                | <i>Main effect of cue</i>               | <i>Main effect of sex</i>           |
| DC1            | F(3,102) = 2.245,<br>p=0.0876           | F(3,102) = 31.82,<br><b>p&lt;0.0001</b> | F(1,34) = 5.045,<br><b>p=0.0313</b> |
| DC2            | F(3,102) = 4.075,<br><b>p=0.0089</b>    | F(3,102) = 103.4,<br><b>p&lt;0.0001</b> | F(1,34) = 6.621,<br><b>p=0.0146</b> |
| DC3*           | F(3,90) = 2.9,<br><b>p=0.0393</b>       | F(3,90) = 151.3,<br><b>p&lt;0.0001</b>  | F(1,30)=9.719,<br><b>p=0.0040</b>   |
| DC4            | F(3,102) = 4.889,<br><b>p=0.0032</b>    | F(3,102) = 198.9,<br><b>p&lt;0.0001</b> | F(1,34) = 8.294,<br><b>p=0.0068</b> |
| Darting        |                                         |                                         |                                     |
| <i>Session</i> | <i>Cue x Sex effects</i>                | <i>Main effect of cue</i>               | <i>Main effect of sex</i>           |
| DC1            | F(3,102) = 1.98,<br>p=0.1216            | F(3,102) = 2.388,<br>p=0.0733           | F(1,34) = 4.146,<br><b>p=0.0496</b> |
| DC2            | F(3,102) = 1.134,<br>p=0.3390           | F(3,102) = 9.377,<br><b>p&lt;0.0001</b> | F(1,34) = 3.667,<br>p=0.0640        |
| DC3*           | F(3,90) = 0.6263,<br>p=0.5996           | F(3,90) = 19.06,<br><b>p&lt;0.0001</b>  | F(1,30)=0.7394,<br>p=0.3959         |
| DC4            | F(3,102) = 10.65,<br><b>p&lt;0.0001</b> | F(3,102) = 15.65,<br><b>p&lt;0.0001</b> | F(1,34) = 13.34,<br><b>p=0.0009</b> |

\*video files for 4 females were corrupted for this session (n=16 females, 16 males)

Table 1. Summary of two-way repeated-measures ANOVA analyses for reward seeking, freezing and darting behaviors during the four discriminative conditioning (DC) sessions.

**A**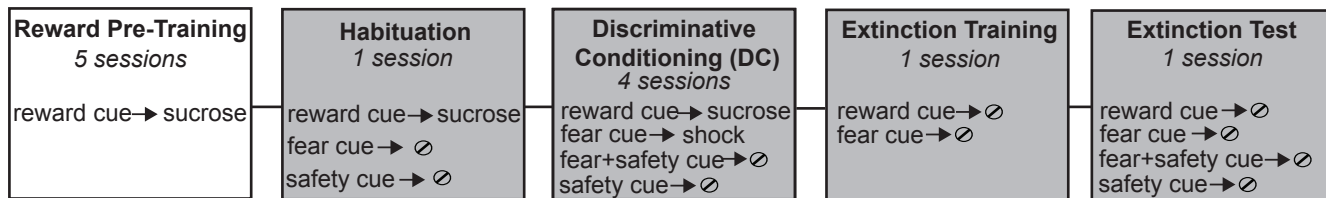**B**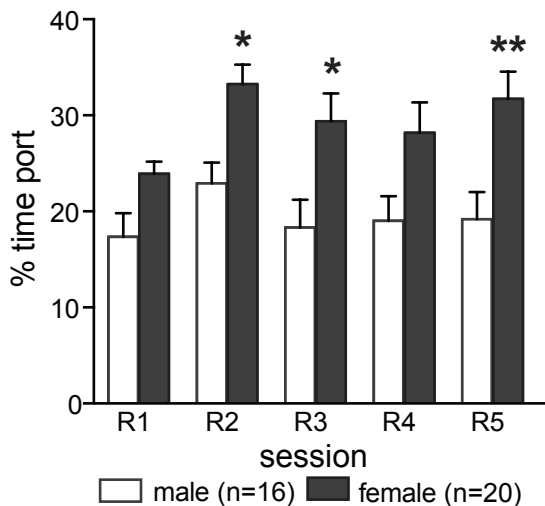**C**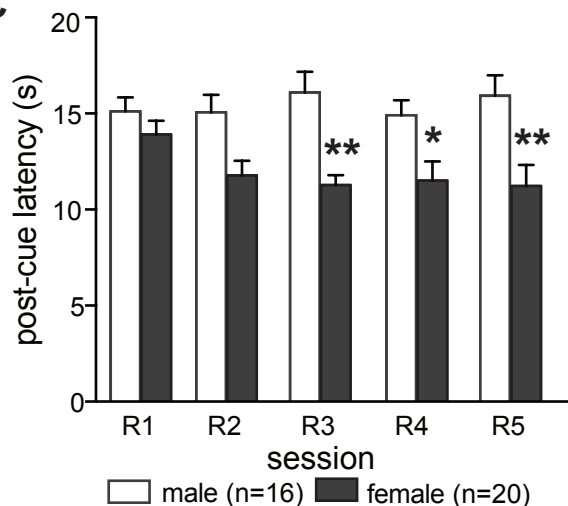

**Figure 1. Females show increased reward seeking in response to the reward cue.** A) Schematic depicting experimental outline. During reward pre-training, rats (16 males, 20 females) received 25 cue-sucrose pairings across 5 separate sessions. B) Averaged percent time spent in the reward port during the five reward pre-training sessions (R1-5). Females spent significantly more time in the port compared to males during R2, R3 and R5. C) Averaged latency to enter the port after cue onset (in seconds). Females entered the port significantly sooner than males during R3-5. Means  $\pm$  SEM. \* $p < 0.05$ , \*\* $p < 0.01$ .

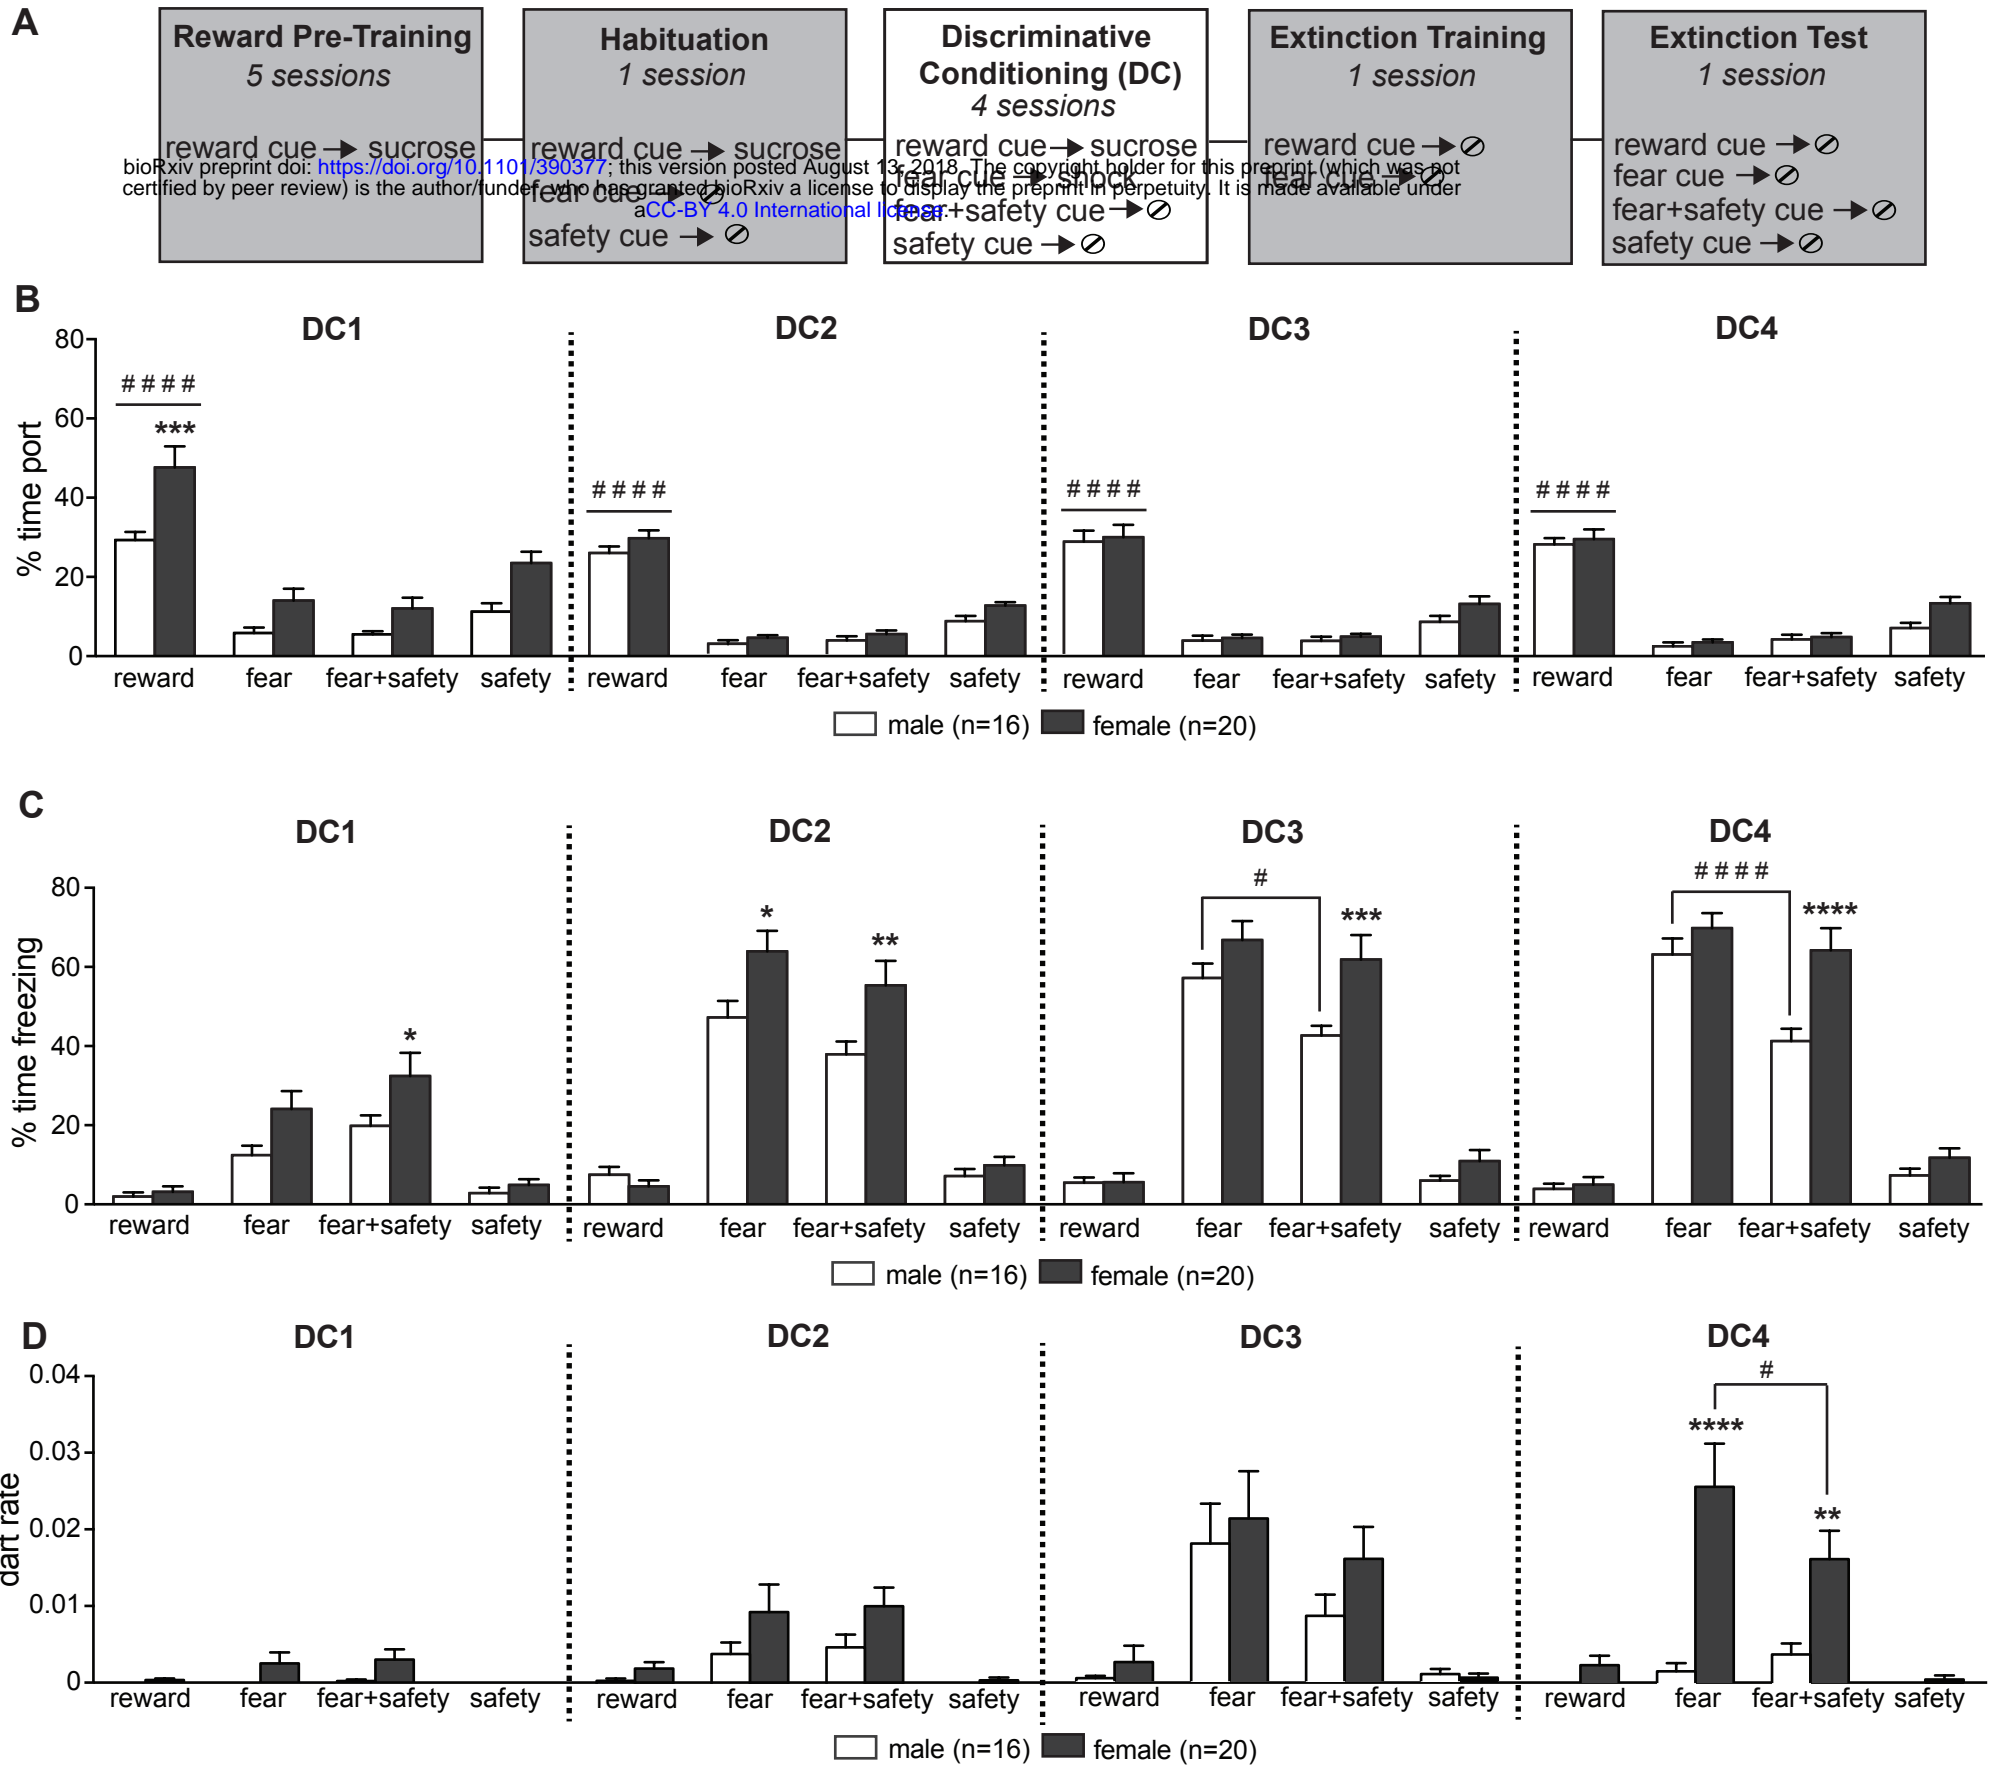

**Figure 2. Females do not show inhibition of conditioned freezing in the presence of the safety cue.** A) Schematic depicting experimental outline. During the 4 DC sessions, rats (16 males, 20 females) were presented with four types of cued trials: reward cue-sucrose, fear cue-shock, fear+safety cue with no footshock and the safety cue presented alone without footshock. B) Averaged percent time spent in the port during each cue across the 4 DC sessions. Both males and females showed significantly higher reward seeking during the reward cue compared to all other cues during every DC session. During DC1, females showed significantly higher reward seeking to the reward cue compared to males. C) Averaged percent time spent freezing during each cue across the 4 DC sessions. During DC3 and DC4, males (n=16) showed significantly lower freezing to the fear+safety cue (and reward and safety cues) when compared to the fear cue. Females did not show significant inhibition of conditioned freezing to the fear+safety cue compared to the fear cue during any DC session. Females also show significantly higher freezing to the fear+safety cue compared to males during every session. D) Darting behavior during each cue across the 4 DC sessions. During DC4 females showed significantly more darts than males during the fear and fear+safety cues. Also, during DC4 females showed a significant inhibition of darting behavior to the fear+safety cue compared to the fear cue. Means  $\pm$  SEM. #  $p < 0.05$ , #####  $p < 0.0001$  within sex, between cue comparison; \*  $p < 0.05$ , \*\*  $p < 0.01$ , \*\*\*  $p < 0.001$ , \*\*\*\*  $p < 0.0001$  within cue, between sex comparison.



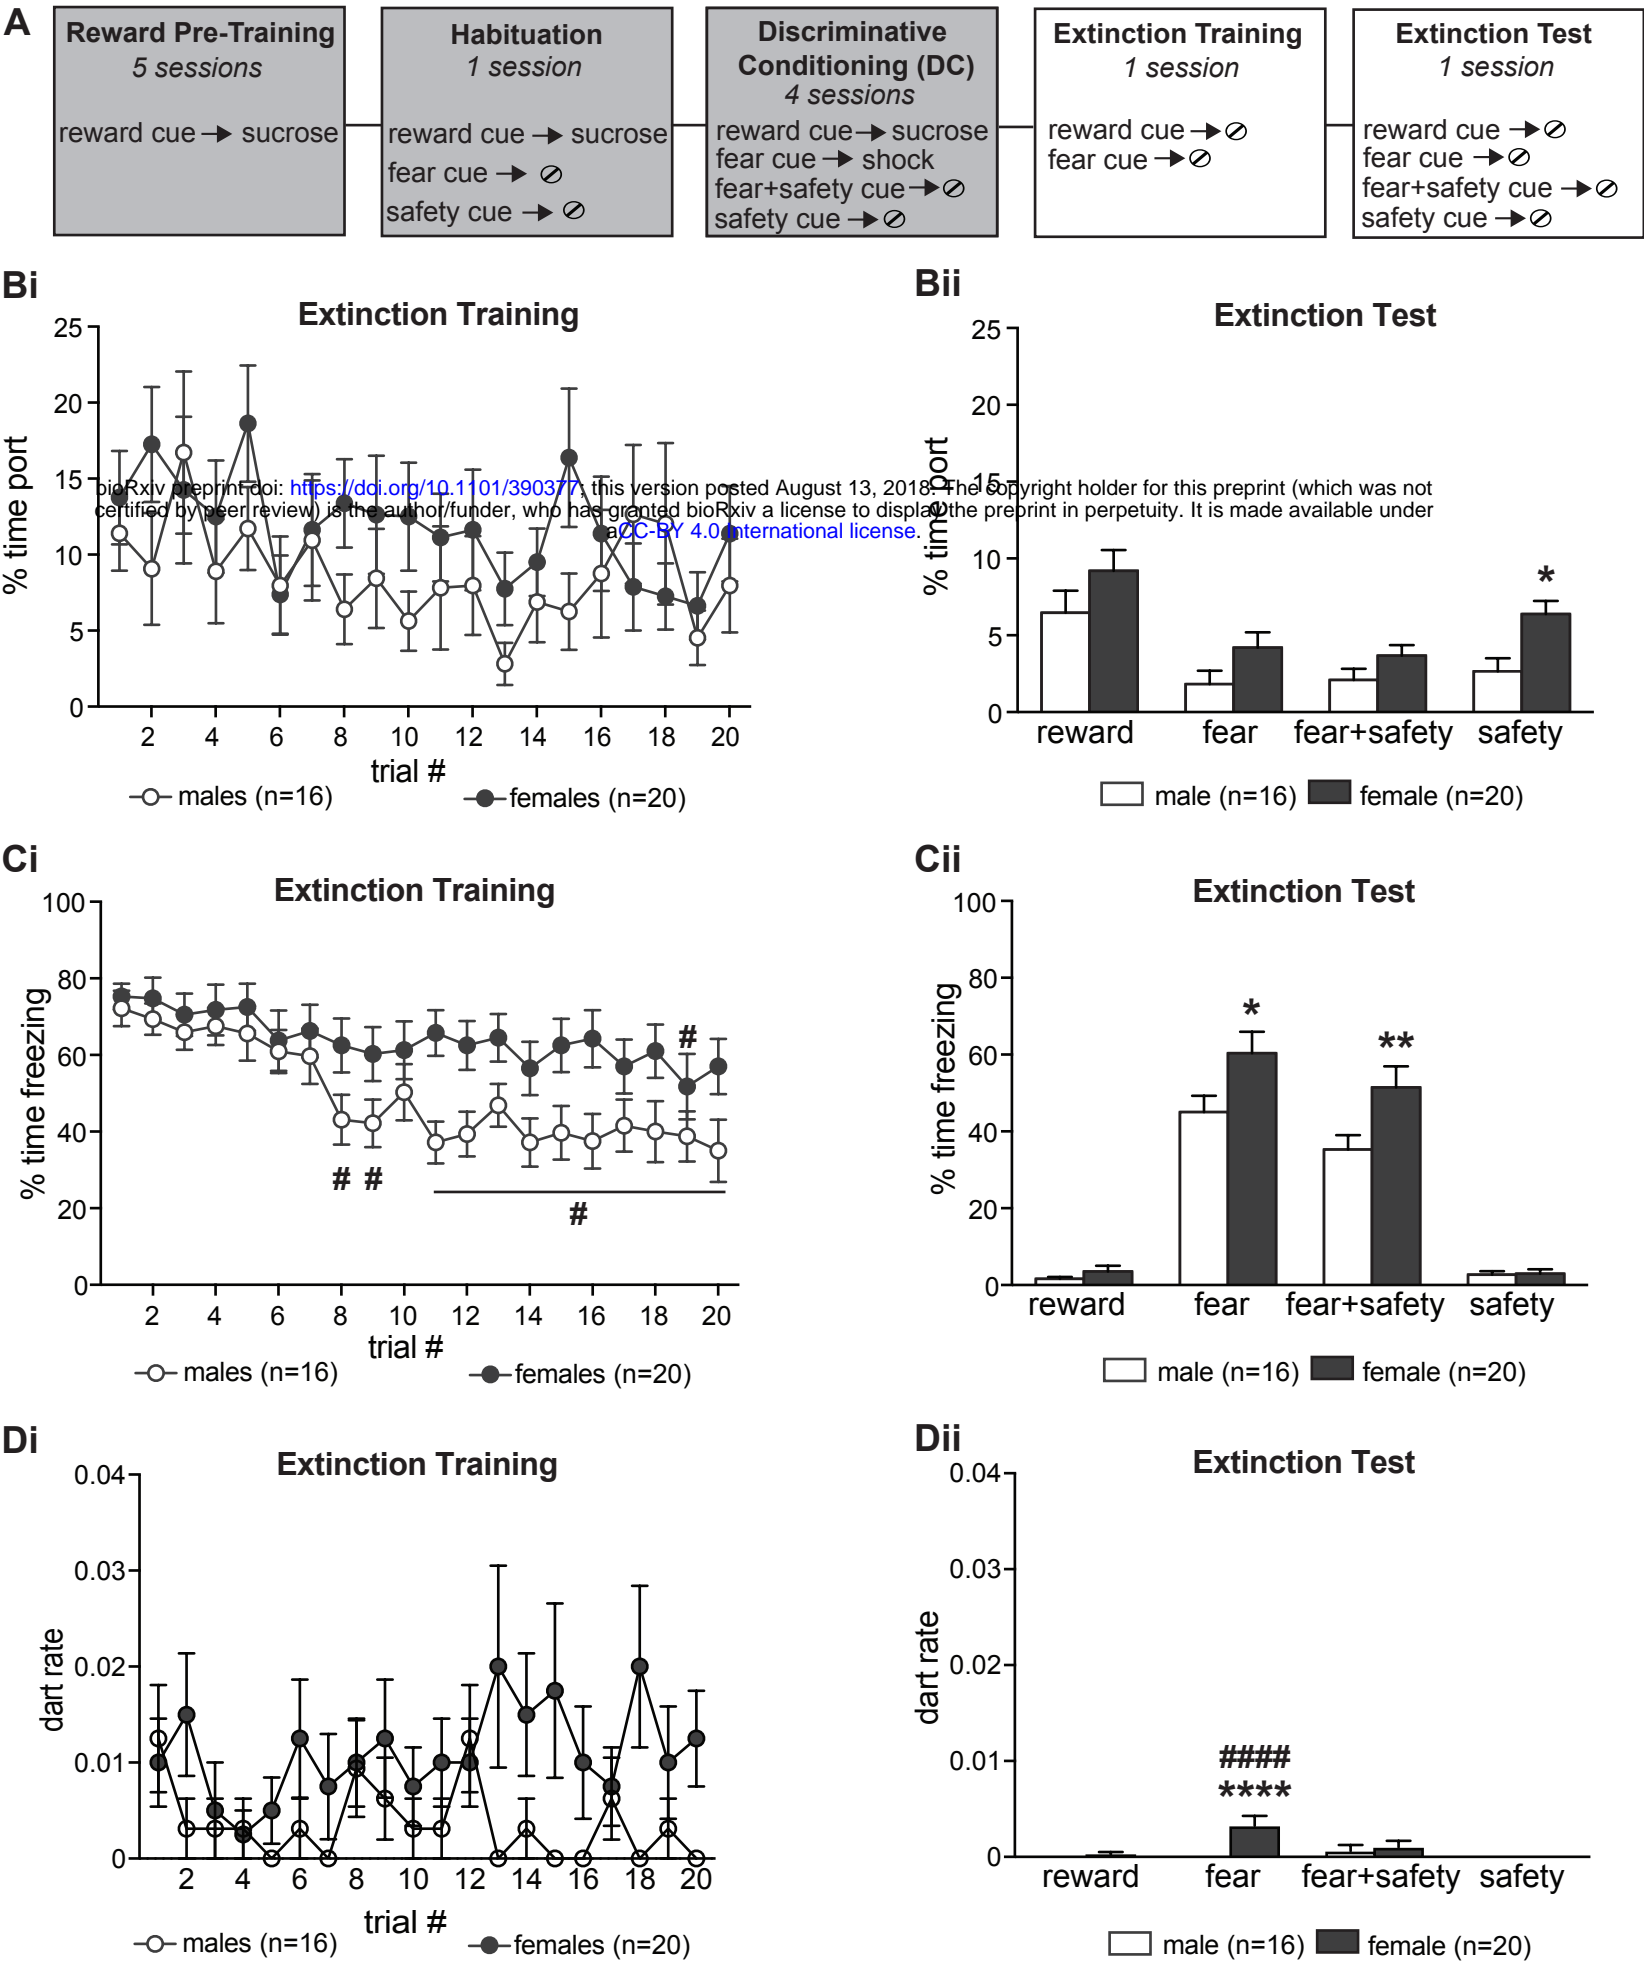

**Figure 3. Females do not show significant extinction of fear.** A) Schematic depicting experimental outline. During extinction training both the reward and fear cues are presented in the same session without reinforcement. During the extinction test 1 day later all cues are presented without reinforcement. Bi) Averaged percent time spent in the port during each reward cue presentation during extinction training. No significant differences were found between males and females during extinction training. Bii) Averaged percent time spent in the port during each cue 1 day after extinction training. Females spent significantly more time in the port than males during the safety cue. Ci) Averaged percent time spent freezing during each fear cue presentation during extinction training. Compared to the first trial of extinction, males showed significantly reduced freezing during trials 8, 9 and 11-20. Freezing levels for females did not significantly decrease at any point in extinction training, with the exception of trial 19. # $p < 0.05$ , compared to trial 1. Cii) Averaged percent time spent freezing during each cue 1 day after extinction training. Males showed evidence of fear cue extinction retention. Females froze significantly more than males during the fear and fear+safety cues. Di) Averaged darting during each fear cue presentation during extinction training. No significant post hoc differences found between males and females during extinction training. Dii) Averaged darting during each cue 1 day after extinction training. Females had a significantly higher dart rate than males during the fear cue. Means  $\pm$  SEM. # $p < 0.05$ , #### $p < 0.0001$  within sex, between cue/trial comparisons. \* $p < 0.05$ , \*\* $p < 0.01$ , \*\*\*\* $p < 0.0001$  within cue, between sex comparisons.



A

**Discriminative Conditioning**  
*females who dart (D)*  
vs  
*females who do not (ND)*

bioRxiv preprint doi: <https://doi.org/10.1101/390377>; this version posted August 13, 2018. The copyright holder for this preprint (which was not certified by peer review) is the author/funder, who has granted bioRxiv a license to display the preprint in perpetuity. It is made available under aCC-BY 4.0 International license.

**extinction behavior?**

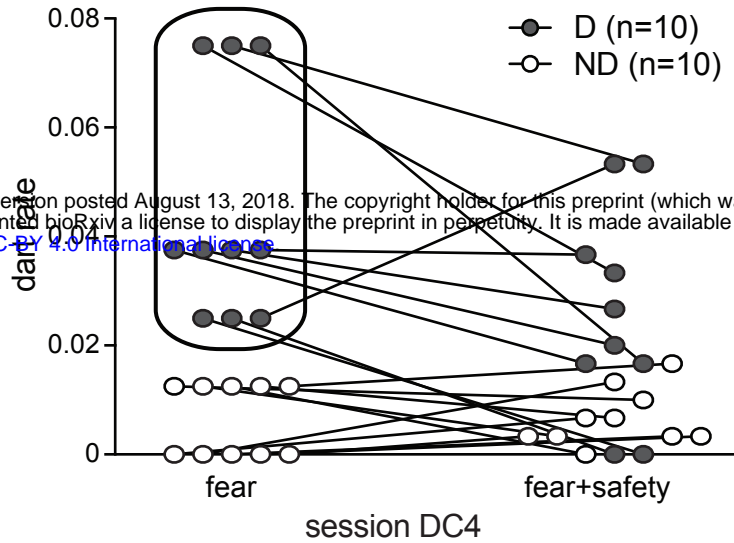

Bi

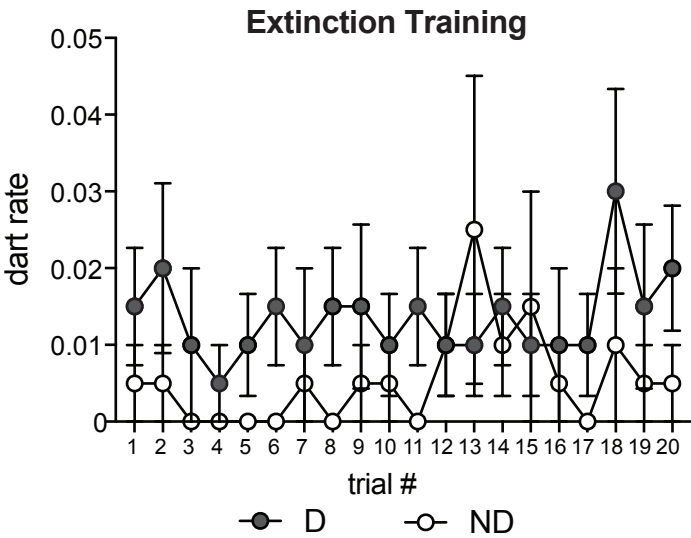

Bii

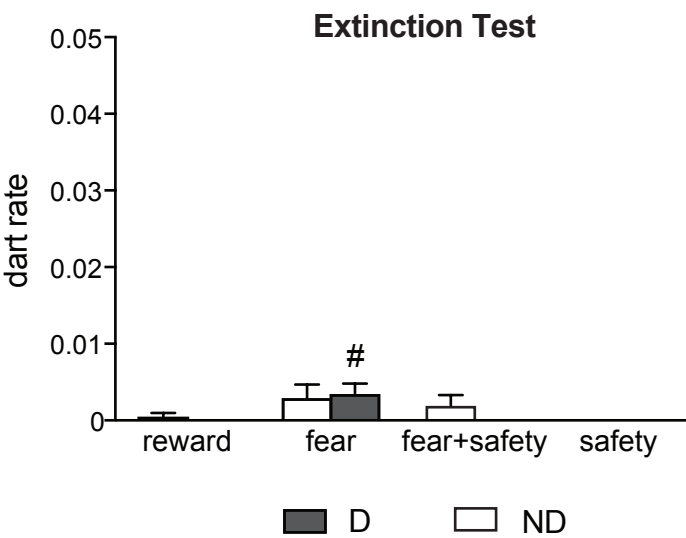

Ci

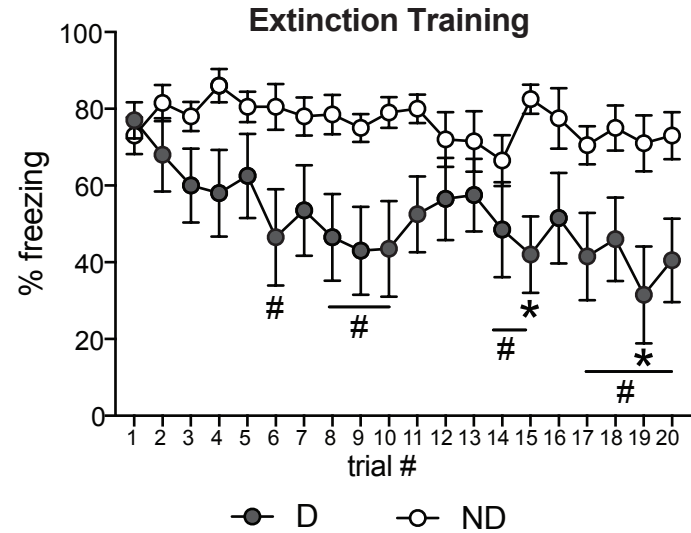

Cii

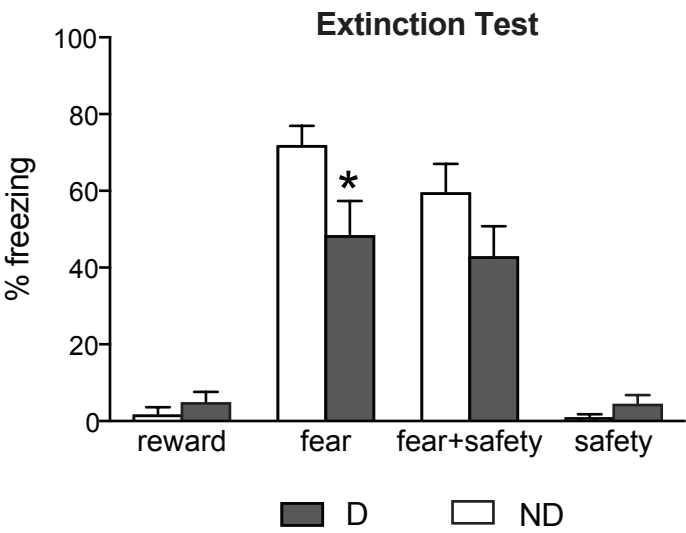

**Figure 4. Extinction differences in female darters versus non-darters.** A) Darting behavior during the last discriminative conditioning session was used to split females into ‘darters’ and ‘non-darters’ to assess if extinction behavior is influenced. A median split of the number of darts during the fear cue during DC4 was used to categorize female rats as ‘darters’ and ‘non-darters’. For 8 of the 10 females categorized as ‘darters’ during the fear cue, darting levels were also in the top 50% during the fear+safety cue. Bi, Bii) Averaged dart rates for each fear cue presentation during extinction training. No significant differences in dart rates were seen between groups during extinction training or test. #p<0.05, females had a higher dart rate during the fear cue compared to all other cues. Ci) Averaged percent time spent freezing during each fear cue presentation during extinction training. Compared to the first trial of extinction, females categorized as ‘darters’ showed a significant reduction in freezing levels during trials 6, 8-10, 14 and 17-20. Freezing levels for females categorized as ‘non-darters’ did not significantly decrease at any point in extinction training. #p<0.05, compared to trial 1. Cii) Averaged percent time spent freezing during each cue 1 day after extinction training. Darters exhibited less freezing to the fear cue than non-darters. \*p<0.05. Means +/- SEM.

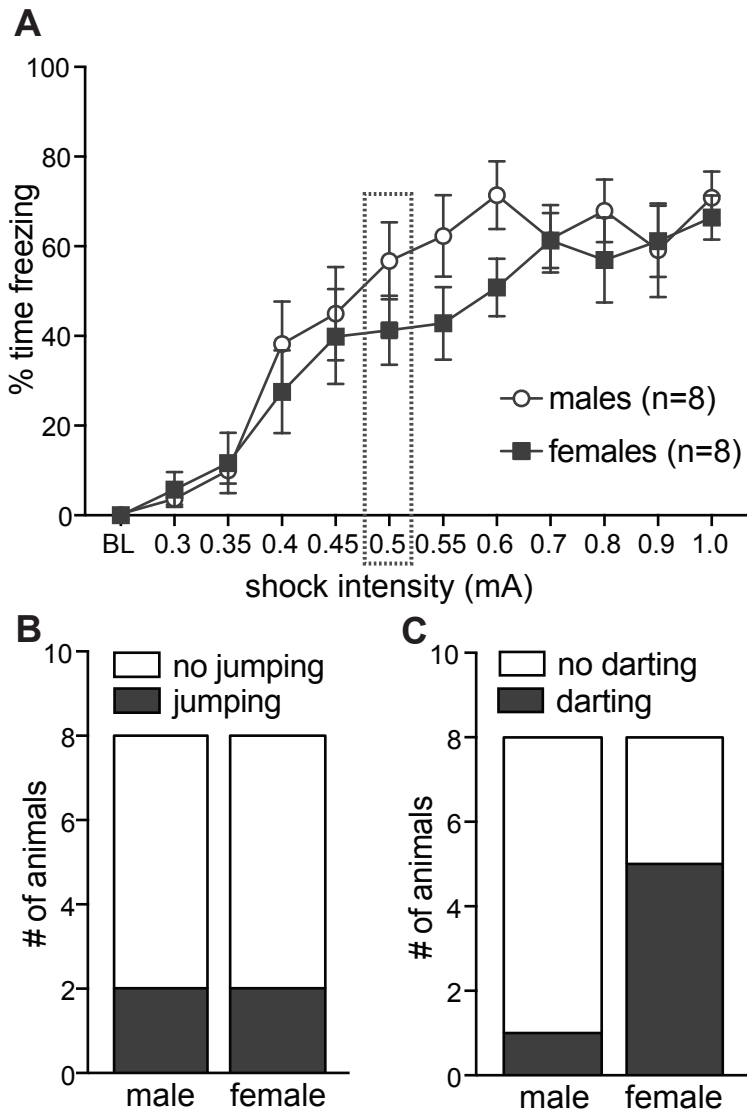

**Figure 5. No significant differences in shock reactivity between age-matched male and female rats.** A) Male and female rats (n=8 each) were subjected to increasing footshock intensities from 0.3mA to 1.0mA. No significant differences in freezing levels (means  $\pm$  SEM) were detected between males and females after each shock presentation. The box around the data at 0.5mA indicates the intensity used for the experiments in this study. There were no significant differences in the number of males or females who jumped (B) or darted (C) in response to the 0.5mA shock.
